# Supplementary material for: Holm multiple correction for large-scale gene-shape association mapping
Source: PubMed Central journal article supplement (PMC4118635; doi:10.1186/1471-2156-15-s1-s5), 2014-06-20
Supplement: 1471-2156-15-S1-S5-S1.pdf [file 1471-2156-15-S1-S5-S1.pdf]

## Additional File 1

**Table 1** The results of the power simulation as depicted in Figure 1.

| <i>m</i>                    | <i>n</i> = 100 |       | <i>n</i> = 300 |       | <i>n</i> = 500 |       |
|-----------------------------|----------------|-------|----------------|-------|----------------|-------|
|                             | Bonferroni     | Holm  | Bonferroni     | Holm  | Bonferroni     | Holm  |
| <i>H</i> <sup>2</sup> = 0.1 |                |       |                |       |                |       |
| 1                           | 0.422          | 0.422 | 0.696          | 0.696 | 0.831          | 0.831 |
| 10                          | 0.179          | 0.207 | 0.388          | 0.462 | 0.565          | 0.677 |
| 50                          | 0.084          | 0.093 | 0.237          | 0.272 | 0.388          | 0.465 |
| 100                         | 0.062          | 0.067 | 0.187          | 0.210 | 0.322          | 0.379 |
| 500                         | 0.030          | 0.032 | 0.103          | 0.112 | 0.203          | 0.229 |
| 1000                        | 0.022          | 0.023 | 0.079          | 0.085 | 0.163          | 0.180 |
| <i>H</i> <sup>2</sup> = 0.4 |                |       |                |       |                |       |
| 1                           | 0.825          | 0.825 | 0.992          | 0.992 | 1.000          | 1.000 |
| 10                          | 0.574          | 0.671 | 0.953          | 0.990 | 0.997          | 1.000 |
| 50                          | 0.406          | 0.480 | 0.890          | 0.975 | 0.989          | 1.000 |
| 100                         | 0.340          | 0.396 | 0.853          | 0.955 | 0.983          | 0.999 |
| 500                         | 0.220          | 0.248 | 0.749          | 0.862 | 0.959          | 0.998 |
| 1000                        | 0.179          | 0.198 | 0.699          | 0.806 | 0.944          | 0.994 |
